# Supplementary material
Source: PubMed Central journal article supplement (PMC8880305)
Supplement: NIHMS1779895-supplement-Supplementary_Table.pdf [file NIHMS1779895-supplement-Supplementary_Table.pdf]

**Supporting Information For:**

**Rapid N-Glycan Profiling of Serum and Plasma by a Novel Slide Based Imaging Mass Spectrometry Workflow**

Calvin R.K. Blaschke, Alyson P. Black, Anand S. Mehta, Peggi M. Angel and Richard R. Drake

Medical University of South Carolina, Dept. of Cell and Molecular Pharmacology, Charleston, SC,  
29425 South Carolina, USA

Running Title: Rapid N-Glycan Profiling of Serum and Plasma

Address reprint requests to:

Richard R. Drake

Medical University of South Carolina

Dept. of Cell and Molecular Pharmacology

173 Ashley Avenue, BSB358

Charleston, South Carolina 29425, USA

843-792-4505

[draker@musc.edu](mailto:draker@musc.edu)

| Observed Mass | Theoretical Mass | Error (ppm) | Error (Da) | Composition             | Putative Structure | Glycosylation Traits |
|---------------|------------------|-------------|------------|-------------------------|--------------------|----------------------|
| 1136.3936     | 1136.3964        | -2.46       | 0.0028     | Hex3HexNAc3 + 1Na       |                    |                      |
| 1257.4178     | 1257.4226        | -3.82       | 0.0048     | Hex5HexNAc2 + 1Na       |                    | Man                  |
| 1282.4618     | 1282.4543        | 5.85        | 0.0075     | Hex3dHex1HexNAc3 + 1Na  |                    | Fuc                  |
| 1298.4501     | 1298.4492        | 0.69        | 0.0009     | Hex4HexNAc3 + 1Na       |                    |                      |
| 1339.4710     | 1339.4757        | -3.51       | 0.0047     | Hex3HexNAc4 + 1Na       |                    | Bi                   |
| 1419.4712     | 1419.4755        | -3.03       | 0.0043     | Hex6HexNAc2 + 1Na       |                    | Man                  |
| 1444.5052     | 1444.5071        | -1.32       | 0.0019     | Hex4dHex1HexNAc3 + 1Na  |                    | Fuc                  |
| 1460.5025     | 1460.5020        | 0.34        | 0.0005     | Hex5HexNAc3 + 1Na       |                    |                      |
| 1485.5323     | 1485.5337        | -0.94       | 0.0014     | Hex3dHex1HexNAc4 + 1Na  |                    | Fuc, Bi              |
| 1501.5287     | 1501.5286        | 0.07        | 0.0001     | Hex4HexNAc4 + 1Na       |                    | Bi                   |
| 1542.5362*    | 1542.5551        | -12.25      | 0.0189     | Hex3HexNAc5 + 1Na       |                    | Bis                  |
| 1581.5275     | 1581.5282        | -0.44       | 0.0007     | Hex7HexNAc2 + 1Na       |                    | Man                  |
| 1606.5643     | 1606.5599        | 2.74        | 0.0044     | Hex5dHex1HexNAc3 + 1Na  |                    | Fuc                  |
| 1611.5181     | 1611.5266        | -5.27       | 0.0085     | Hex4HexNAc3NeuAc1 + 2Na |                    | Sia                  |
| 1647.5813     | 1647.5865        | -3.16       | 0.0052     | Hex4dHex1HexNAc4 + 1Na  |                    | Fuc, Bi              |
| 1663.5813     | 1663.5814        | -0.06       | 0.0001     | Hex5HexNAc4 + 1Na       |                    | Bi                   |
| 1688.6115*    | 1688.6130        | -0.89       | 0.0015     | Hex3dHex1HexNAc5 + 1Na  |                    | Fuc, Bis             |

|           |           |        |        |                              |  |              |
|-----------|-----------|--------|--------|------------------------------|--|--------------|
| 1704.6006 | 1704.6079 | -4.28  | 0.0073 | Hex4HexNAc5 + 1Na            |  | Bis          |
| 1743.5810 | 1743.5810 | 0.00   | 0.0000 | Hex8HexNAc2 + 1Na            |  | Man          |
| 1751.5730 | 1751.5974 | -13.93 | 0.0244 | Hex5HexNAc3NeuAc1 + 1Na      |  | Sia          |
| 1773.5710 | 1773.5872 | -9.13  | 0.0162 | Hex5HexNAc3NeuAc1 + 2Na      |  | Sia          |
| 1792.6277 | 1792.6240 | 2.06   | 0.0037 | Hex4HexNAc4NeuAc1 + 1Na      |  | Sia, Bi      |
| 1809.6462 | 1809.6393 | 3.81   | 0.0069 | Hex5dHex1HexNAc4 + 1Na       |  | Fuc, Bi      |
| 1850.6678 | 1850.6659 | 1.03   | 0.0019 | Hex4dHex1HexNAc5 + 1Na       |  | Fuc, Bis     |
| 1866.6728 | 1866.6608 | 6.43   | 0.0120 | Hex5HexNAc5 + 1Na            |  | Bis          |
| 1905.6358 | 1905.6338 | 1.05   | 0.0020 | Hex9HexNAc2 + 1Na            |  | Man          |
| 1938.6922 | 1938.6819 | 5.31   | 0.0103 | Hex4dHex1HexNAc4NeuAc1 + 1Na |  | Fuc, Sia, Bi |
| 1954.6722 | 1954.6768 | -2.35  | 0.0046 | Hex5HexNAc4NeuAc1 + 1Na      |  | Bi, Sia      |
| 1955.6731 | 1955.6972 | -12.32 | 0.0241 | Hex5dHex2HexNAc4 + 1Na       |  | Fuc, Bi      |
| 1960.6604 | 1960.6638 | -1.73  | 0.0034 | Hex4dHex1HexNAc4NeuAc1 + 2Na |  | Fuc, Sia, Bi |
| 1976.6556 | 1976.6666 | -5.56  | 0.0110 | Hex5HexNAc4NeuAc1 + 2Na      |  | Sia, Bi      |
| 2012.7304 | 2012.7187 | 5.81   | 0.0117 | Hex5dHex1HexNAc5 + 1Na       |  | Fuc, Bis     |
| 2028.7138 | 2028.7136 | 0.10   | 0.0002 | Hex6HexNAc5 + 1Na            |  | Tri          |
| 2100.7473 | 2100.7347 | 6.00   | 0.0126 | Hex5dHex1HexNAc4NeuAc1 + 1Na |  | Fuc, Bi, Sia |

|           |           |       |        |                              |                                                                                       |               |
|-----------|-----------|-------|--------|------------------------------|---------------------------------------------------------------------------------------|---------------|
| 2101.7489 | 2101.7551 | -2.95 | 0.0062 | Hex5dHex3HexNAc4 + 1Na       | 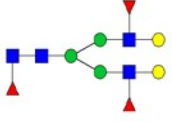   | Fuc, Bi       |
| 2122.7150 | 2122.7245 | -4.48 | 0.0095 | Hex5dHex1HexNAc4NeuAc1 + 2Na |    | Fuc, Sia, Bi  |
| 2158.7939 | 2158.7766 | 8.01  | 0.0173 | Hex5dHex2HexNAc5 + 1Na       |    | Fuc, Tri      |
| 2174.7955 | 2174.7715 | 11.04 | 0.0240 | Hex6dHex1HexNAc5 + 1Na       |    | Fuc, Tri      |
| 2179.7617 | 2179.7460 | 7.20  | 0.0157 | Hex5HexNAc5NeuAc1 + 2Na      |    | Tri, Sia      |
| 2245.7654 | 2245.7722 | -3.03 | 0.0068 | Hex5HexNAc4NeuAc2 + 1Na      |    | Bi, Sia       |
| 2246.7704 | 2246.7926 | -9.88 | 0.0222 | Hex5dHex2HexNAc4NeuAc1 + 1Na |   | Fuc, Bi, Sia  |
| 2267.7636 | 2267.7620 | 0.71  | 0.0016 | Hex5HexNAc4NeuAc2 + 2Na      |  | Bi, Sia       |
| 2268.7652 | 2268.7824 | -7.57 | 0.0172 | Hex5dHex2HexNAc4NeuAc1 + 2Na |  | Fuc, Bi, Sia  |
| 2289.7561 | 2289.7326 | 10.26 | 0.0235 | Hex5HexNAc4NeuAc2 + 3Na      |  | Bi, Sia       |
| 2303.8430 | 2303.8141 | 12.54 | 0.0289 | Hex5dHex1HexNAc5NeuAc1 + 1Na |  | Tri, Fuc, Sia |
| 2304.8372 | 2304.8345 | 1.17  | 0.0027 | Hex5dHex3HexNAc5 + 1Na       |  | Tri, Fuc      |
| 2319.8280 | 2319.8090 | 8.19  | 0.0190 | Hex6HexNAc5NeuAc1 + 1Na      |  | Tri, Sia      |
| 2320.8293 | 2320.8294 | -0.04 | 0.0001 | Hex6dHex2HexNAc5 + 1Na       |  | Tri, Fuc      |

|           |           |       |        |                              |                                                                                       |               |
|-----------|-----------|-------|--------|------------------------------|---------------------------------------------------------------------------------------|---------------|
| 2325.8060 | 2325.8039 | 0.90  | 0.0021 | Hex5dHex1HexNAc5NeuAc1 + 2Na | 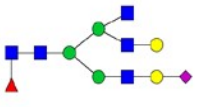   | Tri, Sia, Fuc |
| 2341.7948 | 2341.7988 | -1.71 | 0.0040 | Hex6HexNAc5NeuAc1 + 2Na      |    | Tri, Sia      |
| 2391.8211 | 2391.8301 | -3.76 | 0.0090 | Hex5dHex1HexNAc4NeuAc2 + 1Na |    | Fuc, Bi, Sia  |
| 2393.8442 | 2393.8458 | -0.67 | 0.0016 | Hex7HexNAc6 + 1Na            |    | Tetra         |
| 2413.8225 | 2413.8199 | 1.08  | 0.0026 | Hex5dHex1HexNAc4NeuAc2 + 2Na |    | Fuc, Bi, Sia  |
| 2435.8429 | 2435.8097 | 13.63 | 0.0332 | Hex5dHex1HexNAc4NeuAc2 + 3Na |    | Fuc, Bi, Sia  |
| 2449.8932 | 2449.8720 | 8.65  | 0.0212 | Hex5dHex2HexNAc5NeuAc1 + 1Na |    | Tri, Fuc, Sia |
| 2465.8986 | 2465.8669 | 12.86 | 0.0317 | Hex6dHex1HexNAc5NeuAc1 + 1Na |   | Fuc, Tri, Sia |
| 2466.9006 | 2466.8873 | 5.39  | 0.0133 | Hex6dHex3HexNAc5 + 1Na       |  | Fuc, Tri      |
| 2487.8561 | 2487.8567 | -0.24 | 0.0006 | Hex6dHex1HexNAc5NeuAc1 + 2Na |  | Fuc, Tri, Sia |
| 2610.9273 | 2610.9044 | 8.77  | 0.0229 | Hex6HexNAc5NeuAc2 + 1Na      |  | Tri, Sia      |
| 2611.9374 | 2611.9248 | 4.82  | 0.0126 | Hex6dHex2HexNAc5NeuAc1 + 1Na |  | Fuc, Tri, Sia |
| 2632.9301 | 2632.8942 | 13.65 | 0.0359 | Hex6HexNAc5NeuAc2 + 2Na      |  | Tri, Sia      |

|            |           |        |        |                              |                                                                                       |                 |
|------------|-----------|--------|--------|------------------------------|---------------------------------------------------------------------------------------|-----------------|
| 2633.9313  | 2633.9146 | 6.34   | 0.0167 | Hex6dHex2HexNAc5NeuAc1 + 2Na | 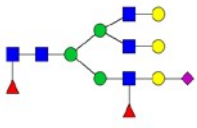   | Fuc, Tri, Sia   |
| 2638.9272  | 2638.8891 | 14.44  | 0.0381 | Hex5dHex1HexNAc5NeuAc2 + 3Na |    | Fuc, Tri, Sia   |
| 2684.9569  | 2684.9412 | 5.85   | 0.0157 | Hex7HexNAc6NeuAc1 + 1Na      |    | Tetra, Sia      |
| 2685.9739  | 2685.9616 | 4.58   | 0.0123 | Hex7dHex2HexNAc6 + 1Na       |    | Tetra, Fuc      |
| 2706.9205  | 2706.9310 | -3.88  | 0.0105 | Hex7HexNAc6NeuAc1 + 2Na      |    | Tetra, Sia      |
| 2757.9599  | 2757.9827 | -8.27  | 0.0228 | Hex6dHex3HexNAc5NeuAc1 + 1Na |   | Tri, Fuc, Sia   |
| 2779.9401  | 2779.9725 | -11.65 | 0.0324 | Hex6dHex3HexNAc5NeuAc1 + 2Na |  | Tri, Fuc, Sia   |
| 2902.0267  | 2901.9998 | 9.27   | 0.0269 | Hex6HexNAc5NeuAc3 + 1Na      |  | Tri, Sia        |
| 2923.9973  | 2923.9896 | 2.63   | 0.0077 | Hex6HexNAc5NeuAc3 + 2Na      |  | Tri, Sia        |
| 2976.0366* | 2976.0808 | -14.85 | 0.0442 | Hex7HexNAc6NeuAc2 + 1Na      |  | Tetra, Sia      |
| 2977.0911  | 2977.0570 | 11.45  | 0.0341 | Hex7dHex2HexNAc6NeuAc1 + 1Na |  | Tetra, Fuc, Sia |

|           |           |       |        |                                 |  |               |
|-----------|-----------|-------|--------|---------------------------------|--|---------------|
| 3049.0833 | 3049.0781 | 1.71  | 0.0052 | Hex6dHex3HexNAc5NeuAc2<br>+ 1Na |  | Tri, Fuc, Sia |
| 3050.0908 | 3050.0734 | 5.71  | 0.0174 | Hex8HexNAc7NeuAc1 + 1Na         |  | Tetra, Sia    |
| 3071.0456 | 3071.0679 | -7.25 | 0.0223 | Hex6dHex3HexNAc5NeuAc2<br>+ 2Na |  | Tri, Fuc, Sia |

**Supplemental Table 1.** Peak list of N-glycans detected in serum and plasma. N-glycans marked with an asterisk (\*) were only seen in serum samples from patients with benign lesions or breast cancer. Man = high mannose, Fuc = fucosylated, Com = complex, Bi = bi-antennary, Tri = tri-antennary, Tetra = tetra-antennary, Bis = bisected, Sia = sialylated.

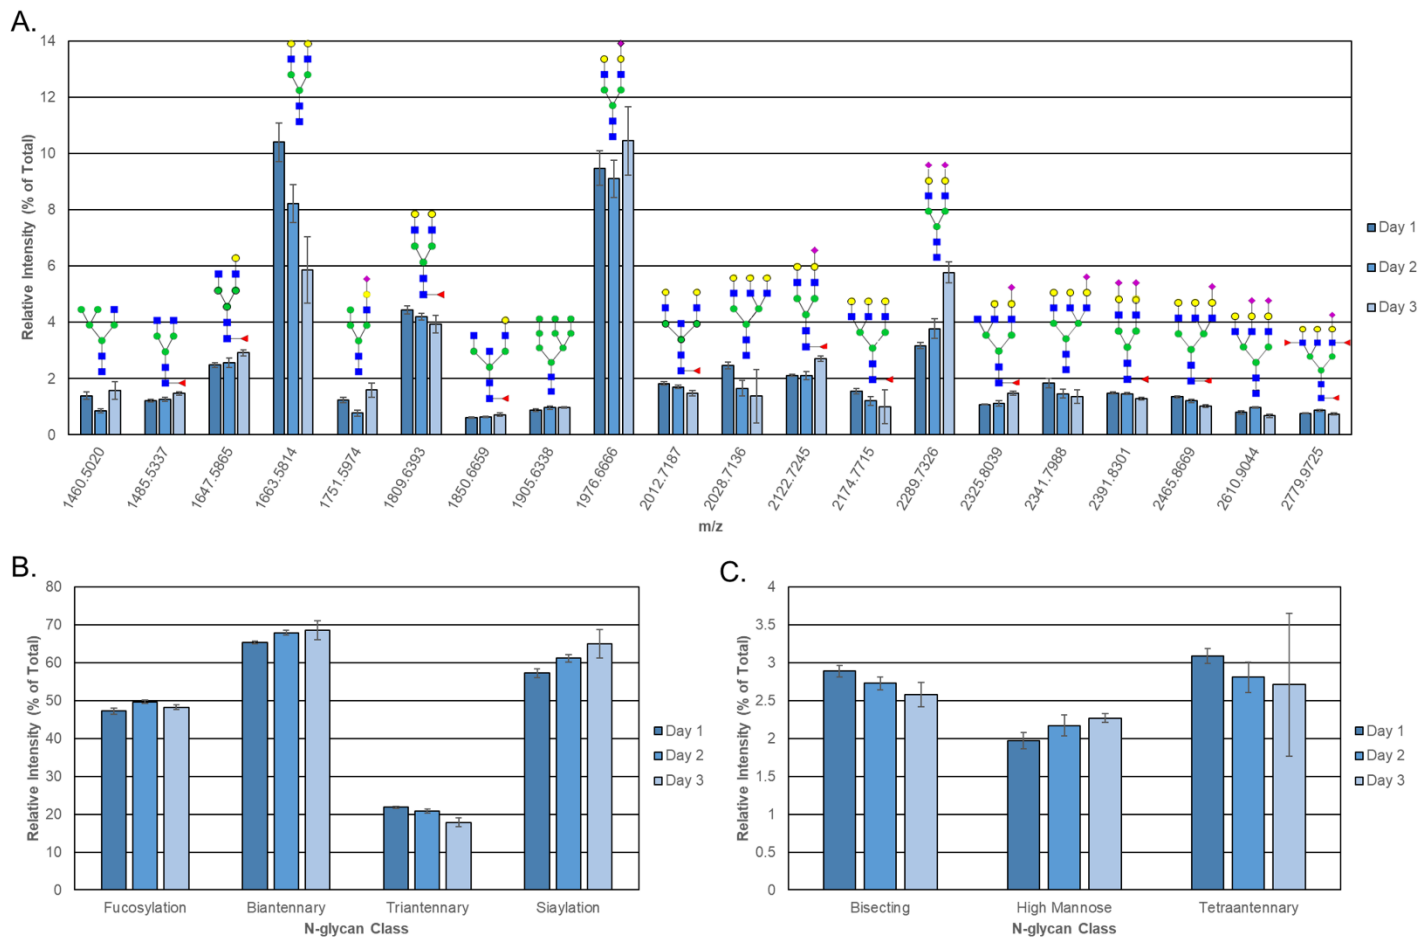

**Supplementary Figure 1.** Repeatability of the N-glycan profiling method for plasma. The same plasma standard sample was analyzed on three successive days with a blank well that contained no serum on each run. (A) The graph shows the average relative intensities detected for the twenty most abundant N-glycans (normalized to the overall sum of N-glycan intensities) with putative structures. For determining the most abundant N-glycans, only N-glycans with no overlap with another N-glycan peak isotope were included, and only one species was selected for sialylated N-glycans with multiple sodiated adducts. Structural classes were assigned to the N-glycans, and the sum of the N-glycans for the (B) high abundance and (C) low abundance classes are displayed. Error bars indicate the standard deviation of the four replicates.



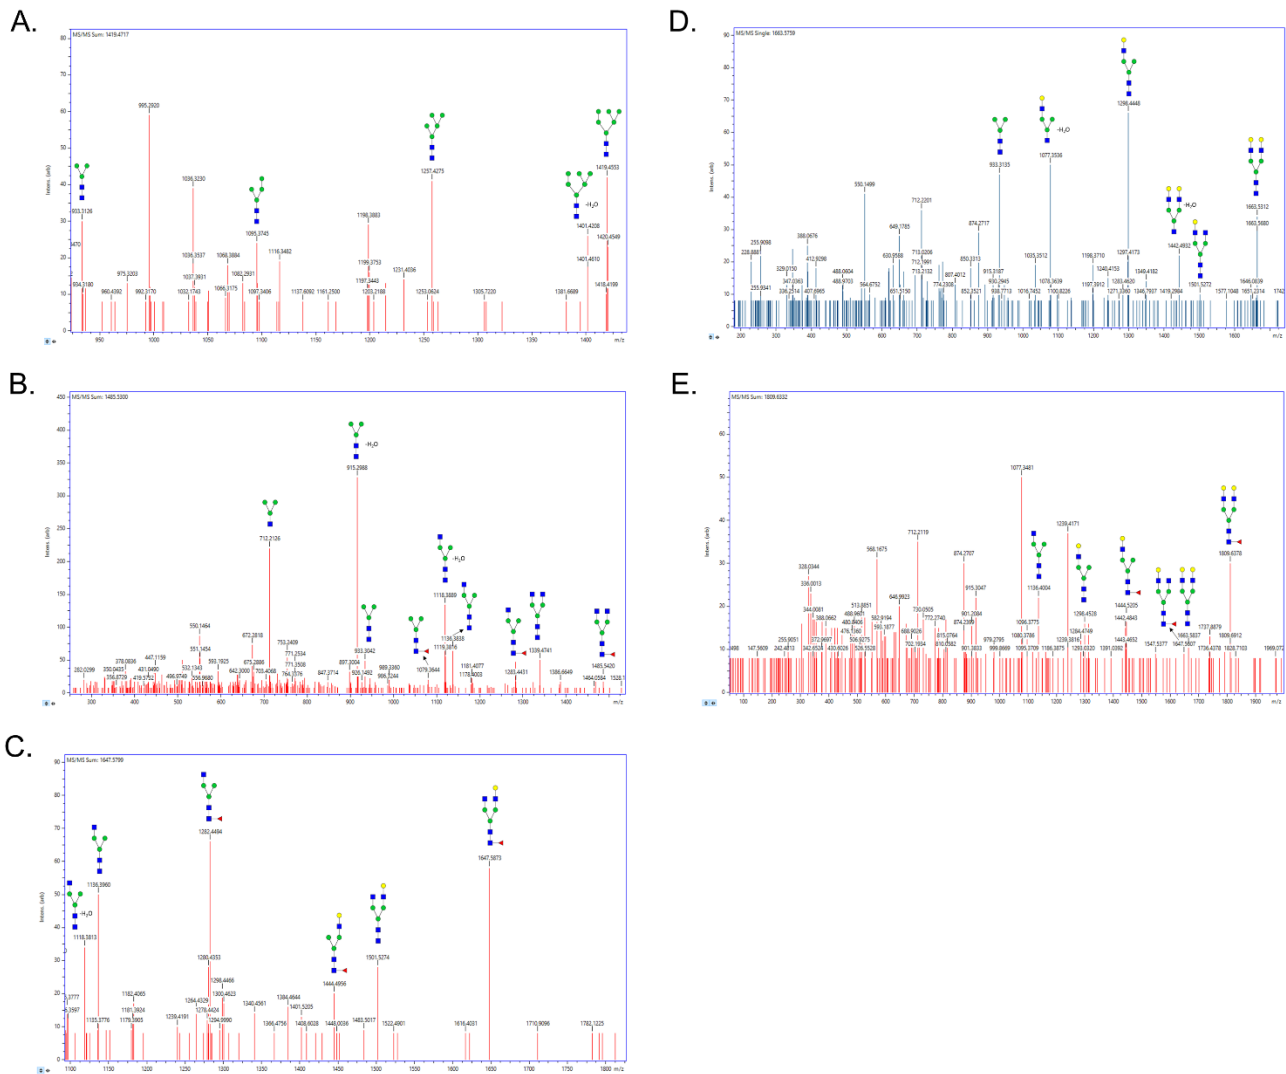

**Supplementary Figure 2.** MS/MS of serum N-glycans by CID done directly on the slide. A)  $m/z = 1419.4755$ , B)  $m/z = 1485.5337$ , C)  $m/z = 1647.5865$ , D)  $m/z = 1663.5814$ , and E)  $m/z = 1809.6393$  N-glycan structures were confirmed with MALDI-TOF MS/MS. The collision energies and number of laser shots were individually optimized for each N-glycan.
